# Supplementary material for: The Use of a Biopolymer Conjugate for an Eco-Friendly One-Pot Synthesis of Palladium-Platinum Alloys
Source: MDPI journal article supplement (doi:10.3390/polym11121948), 2019-11-27
Supplement: s1 [file s1]

# The use of a biopolymer conjugate for an eco-friendly one-pot synthesis of palladium-platinum alloys

Daniele Silvestri<sup>1</sup>, Stanisław Waclawek<sup>1\*</sup>, Rohith K. Ramakrishnan<sup>1</sup>, Abhilash Venkateshaiah<sup>1</sup>, Kamil Krawczyk<sup>1</sup>, Vinod V.T. Padil<sup>1</sup>, Bartłomiej Sobel<sup>2</sup> and Miroslav Černík<sup>1\*</sup>

<sup>1</sup>Institute for Nanomaterials, Advanced Technologies and Innovation, Technical University of Liberec, , 46117 Liberec, Czech Republic

<sup>2</sup>Institute of Engineering Materials and Biomaterials, Faculty of Mechanical Engineering, Silesian University of Technology, 44–100 Gliwice, Poland

\*Correspondence: stanislaw.waclawek@tul.cz (S.W.); miroslav.cernik@tul.cz (M.Č.)

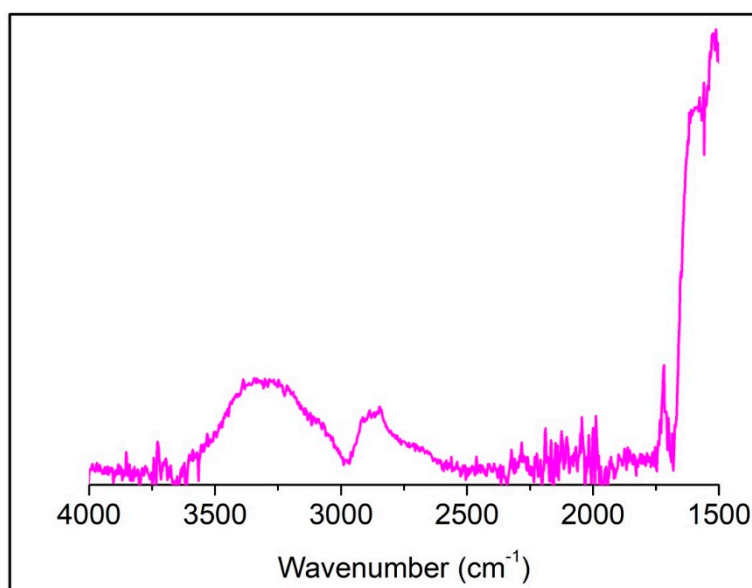

**Figure 1.** ATR-FTIR analysis of Pd/Pt ratio 1:1.

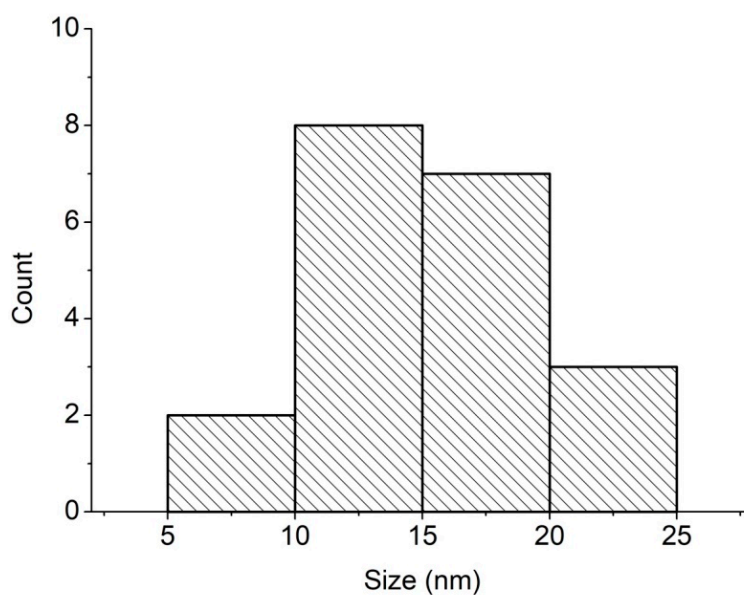

**Figure 2.** Size distribution of Pd/Pt synthesized at 130 °C and molar ratio 2:1 (Pd:Pt).

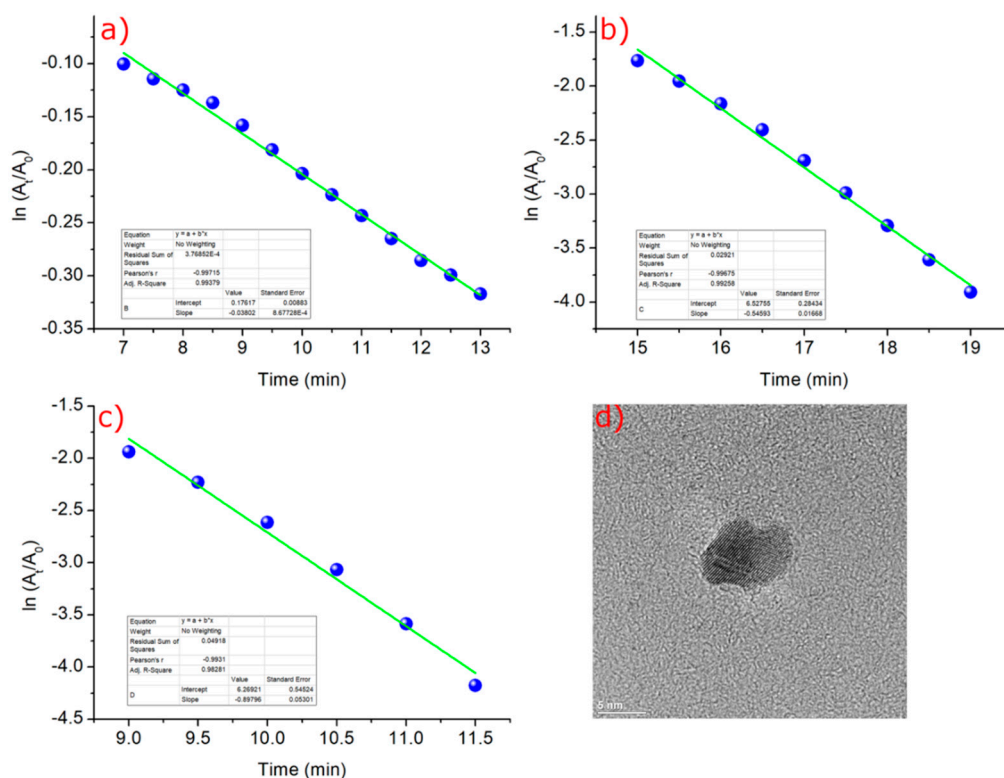

**Figure 3.** Pseudo-first-order kinetics of sample synthesized with molar ratio of 1:1 with different concentration of nanoparticles (a) 0.379 mg/L ( $R^2$  0.993), (b) 0.757 mg/L ( $R^2$  0.992), (c) 1.515 mg/L ( $R^2$  0.982) and (d) HRTEM image of Pd/Pt decahedron nanoparticle (molar ratio 1:1 (Pd/Pt) 130 °C).

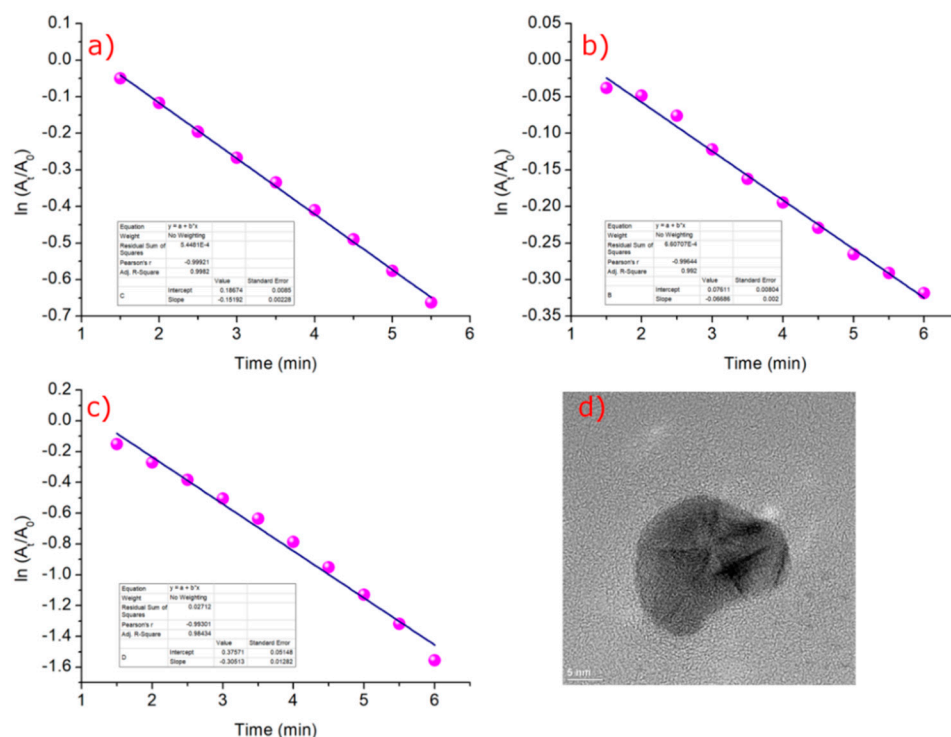

**Figure 4.** Pseudo-first-order kinetics of sample synthesized with molar ratio of 1:2 with different concentration of nanoparticles (a) 0.147 mg/L ( $R^2$  0.992), (b) 0.293 mg/L ( $R^2$  0.998), (c) 0.586 mg/L ( $R^2$  0.984) and (d) HRTEM image of Pd/Pt decahedron nanoparticle (molar ratio 1:2 (Pd/Pt) 130 °C).

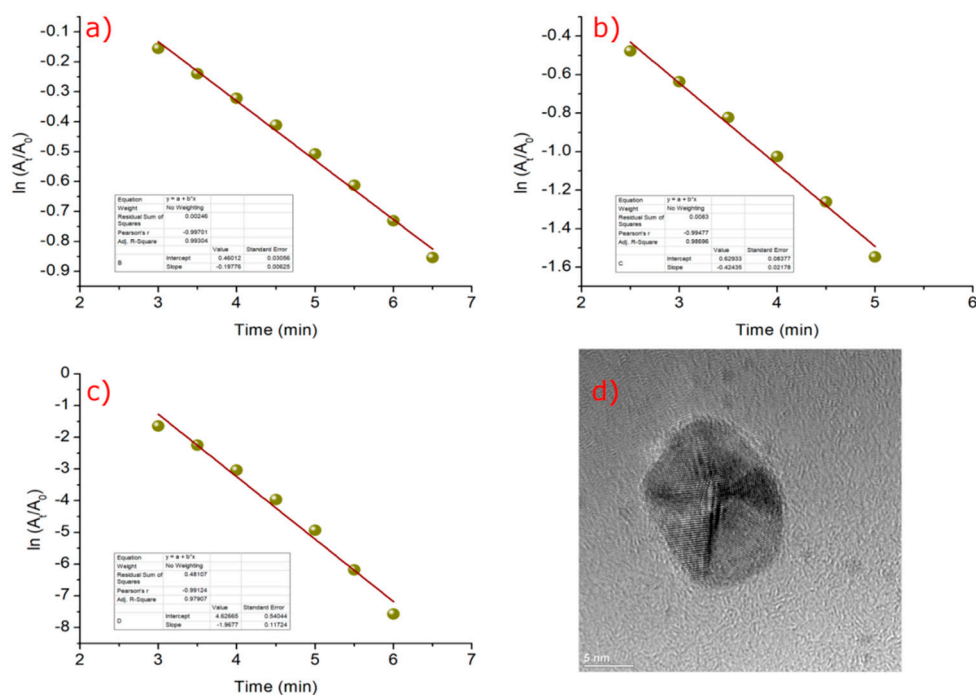

**Figure 5.** Pseudo-first-order kinetics of sample synthesized with molar ratio of 2:1 with different concentration of nanoparticles (a) 0.202 mg/L ( $R^2$  0.997) (b) 0.404 mg/L ( $R^2$  0.986) (c) 0.809 g/L ( $R^2$  0.979) and (d) HRTEM image of Pd/Pt decahedron nanoparticle (molar ratio 2:1 (Pd/Pt) 130 °C).
